# Supplementary material
Source: HighWire-hosted journal article supplement (https://bmjpaedsopen.bmj.com/content/suppl/2021/04/22/10.1136.bmjpo-2021-001052)

### Appendix III

Map of Ghana showing the distribution of patients over Ghana. Numbers indicate the number of patients coming from this city.

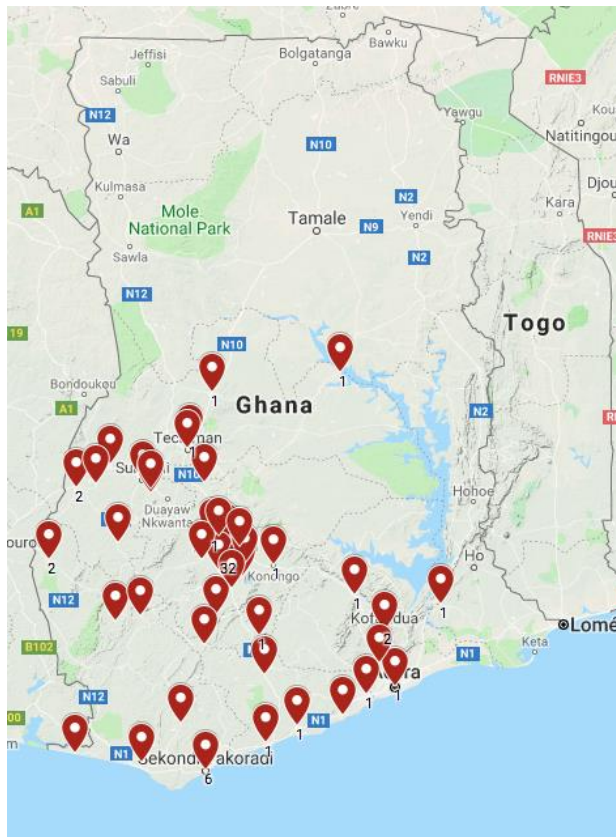

Supplement: bmjpo-2021-001052supp003_data_supplement.pdf [file bmjpo-2021-001052supp003_data_supplement.pdf]
